# Supplementary material for: Repeated Social Defeat Enhances CaCl2-Induced Abdominal Aortic Aneurysm Expansion by Inhibiting the Early Fibrotic Response via the MAPK-MKP-1 Pathway
Source: MDPI journal article supplement (doi:10.3390/cells11040732), 2022-02-19
Supplement: s1 [file s1]

# Repeated social defeat enhances CaCl<sub>2</sub>-induced abdominal aortic aneurysm expansion by inhibiting the early fibrotic response via the MAPK-MKP-1 pathway

## Supplementary Figure Legends

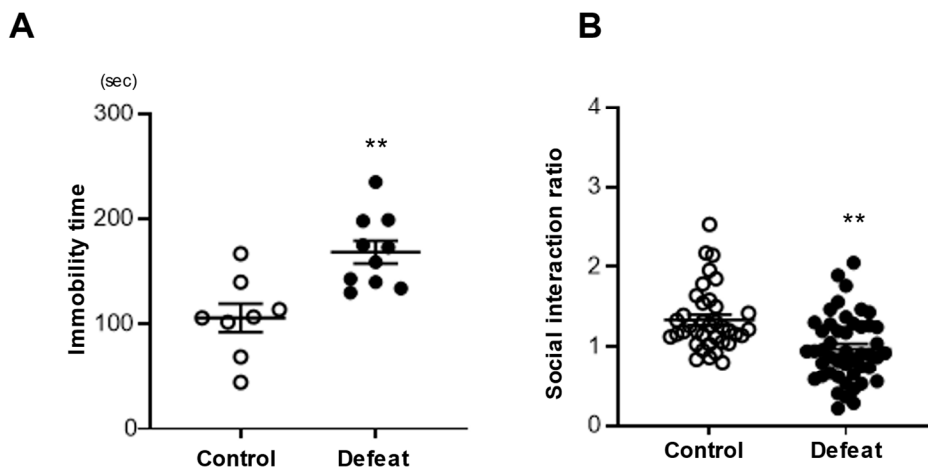

### Figure S1. Analysis of depression-like behaviors.

**(A)** Tail suspension test. Values represent the mean  $\pm$  standard error of the mean (SEM) for eight non-exposed mice and ten RSD-exposed mice before CaCl<sub>2</sub> application.  $**p < 0.01$  vs. non-exposed mice; Student's t-test. **(B)** Social interaction test. Values represent mean  $\pm$  standard error of mean (SEM) for 37 non-exposed mice and 47 RSD-exposed mice before CaCl<sub>2</sub> application.  $**p < 0.01$  vs. non-exposed mice; Student's t-test. RSD, repeated social stress.

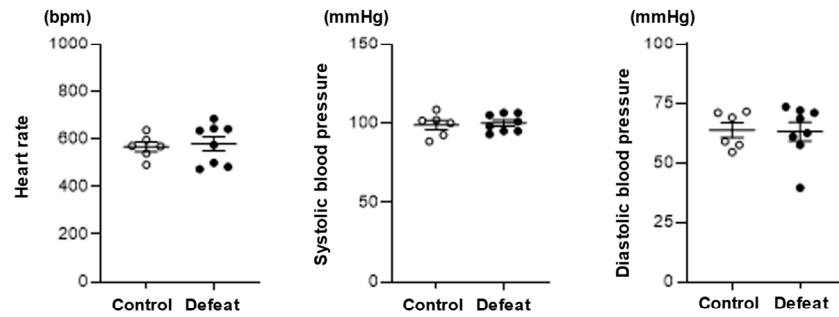

**Figure S2. Body weight and hemodynamic parameters before  $\text{CaCl}_2$  application are comparable between the two groups.** Body weight, blood pressure, and heart rate are equivalent between the two groups. Values are mean  $\pm$  SEM for six control and eight defeated mice. Control: undefeated control mice. Defeat: defeated mice.

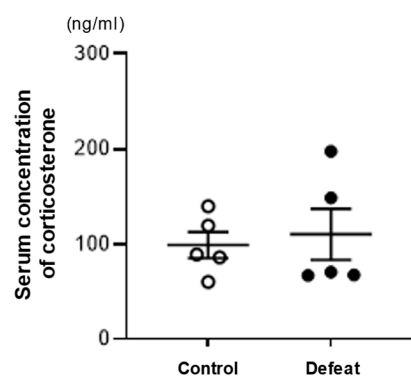

**Figure S3. Serum concentrations of corticosterone.** Values are mean  $\pm$  SEM for five control and five defeated mice. Control: undefeated control mice. Defeat: defeated mice.

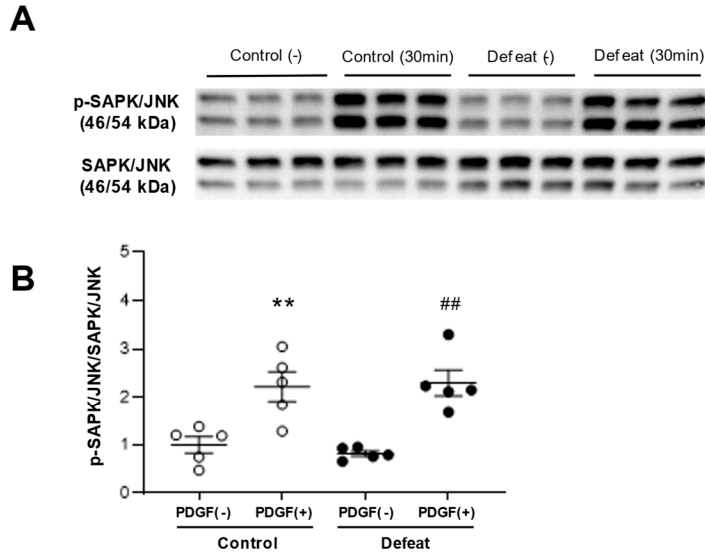

**Figure S4. Repeated social defeat does not affect PDGF-induced JNK phosphorylation in primary cultured VSMCs. (A and B)** Representative Western blot of JNK phosphorylation in VSMCs at 30 min after PDGF stimulation and a quantitative analysis of the protein expression. Values are the mean  $\pm$  SEM for five control and five defeated mice. \*\* $p < 0.01$  vs. control without PDGF stimulation. ## $p < 0.01$  vs. defeat without PDGF stimulation; two-way repeated measures ANOVA with the Tukey–Kramer post hoc test.

**A**

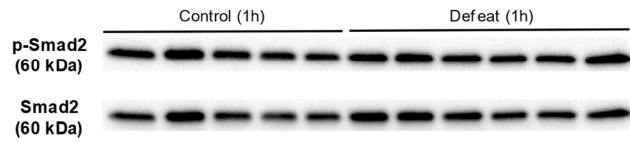

**B**

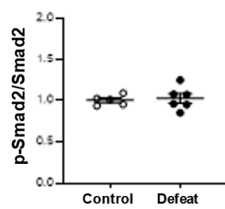

**Figure S5. Repeated social defeat does not affect TGF- $\beta$ -induced Smad2 phosphorylation in primary cultured VSMCs. (A and B)** Representative Western blot of Smad2 phosphorylation in VSMCs at 60 min after TGF- $\beta$  stimulation and a quantitative analysis of the protein expression. Values are the mean  $\pm$  SEM for five control and five defeated mice.

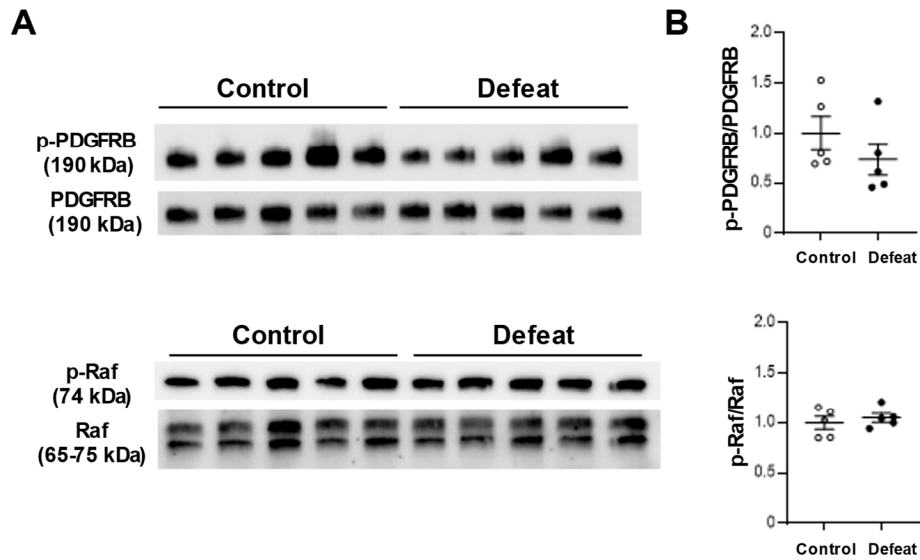

**Figure S6. Repeated social defeat does not affect PDGF-induced phosphorylation of PDGFRB and Raf in primary cultured VSMCs. (A and B)** Representative Western blot of the phosphorylation of platelet derived growth factor receptor  $\beta$  (PDGFRB) and Raf in VSMCs at 30 min after PDGF stimulation and a quantitative analysis of the protein expression. Values are the mean  $\pm$  SEM for five control and five defeated mice.

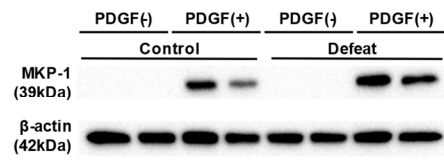

**Figure S7. MKP-1 protein expression before PDGF stimulation.** Representative Western blot of MKP-1 in VSMCs before and after PDGF stimulation.
