# Supplementary material for: Repeated Social Defeat Enhances CaCl2-Induced Abdominal Aortic Aneurysm Expansion by Inhibiting the Early Fibrotic Response via the MAPK-MKP-1 Pathway
Source: Cells. 2022 Feb 19;11(4):732. doi: 10.3390/cells11040732 (PMC8870675; doi:10.3390/cells11040732)
Supplement: Supplementary file 1 [file cells-11-00732-s001.zip › Supplementary Table S1.xlsx]

## Sheet: primer
genes	forward	reverse
GAPDH	5’-AGGTCGGTGTGAACGGATTTG-3’	5’-GGGGTCGTTGATGGCAACA-3’
F4/80	5’-CTTTGGCTATGGGCTTCCAGTC-3’	5’-GCAAGGAGGACAGAGTTTATCGTG-3’
TNF-α	5’-GTTCTATGGCCCAGACCCTCACA-3’	5’-TCCCAGGTATATGGGCTCATACC-3’
IL-1β	5’-AGAGCCCATCCTCTGTGACTCA-3’	5’-TCATATGGGTCCGACAGCACGA-3’
IL-4	5’-GGTCTCAACCCCCAGCTAGT-3’	5’-GCCGATGATCTCTCTCAAGTGAT-3’
TGF-β	5’-TTGCTTCAGCTCCACAGAGA-3’	5’-TGGTTGTAGAGGGCAAGGAC-3’
MKP-1	5’-GCGCTCCACTCAAGTCTTCT-3’	5’-AGAGGGGTACTACAGGAGCT-3’
